# Supplementary material
Source: PubMed Central journal article supplement (PMC8361455)
Supplement: advancesADV2021004267C-suppl1.pdf [file advancesADV2021004267C-suppl1.pdf]

## **APPENDIX – REGIONAL EVIDENCE OF RESOURCE UTILIZATION (Public price)**

### **Average Hospital Stay for VTE (public hospital)**

Chile (Chilean Pesos) - \$ 1.717.963

Colombia (Colombian Pesos) - \$ 2.300.986

### **Unfractionated Heparin (cost per unit)**

Chile (Chilean Pesos) - \$ 1.580,00

Colombia (Colombian Pesos) - \$ 320,96

Brazil (Reales) - \$ 30,45

Argentina (Argentine pesos) - \$225

### **Low Molecular Weight Heparins (cost per unit)**

Chile (Chilean Pesos) - \$ 6.000,00

Colombia (Colombian Pesos) - \$ 320,96

Brazil (Reales) - \$ 49,00

Argentina (Argentine pesos) - \$557.75

### **Rivaroxaban 10 mg (cost per unit)**

Chile (Chilean Pesos) - \$ 1.468,00

Colombia (Colombian Pesos) - \$ 6.950,00

Brazil (Reales) - \$ 2,27

Argentina (Argentine pesos) - \$179.4

### **Dabigatran 150 mg (cost per unit)**

Chile (Chilean Pesos) - \$ 650,00

Colombia (Colombian Pesos) - \$ 3.184,00

Brazil (Reales) - \$ 2,27

Argentina (Argentine pesos) - \$53.4

### **Compression stockings (cost per unit)**

Chile (Chilean Pesos) - \$ 5.500,00

### **D Dimer (cost per unit)**

Chile (Chilean Pesos) - \$ 12.860,00

Colombia (Colombian Pesos) - \$ 30.210,00

Brazil (Reales) - \$ 37.031,00
