# Supplementary material
Source: PubMed Central journal article supplement (PMC8361455)
Supplement: advancesADV2021004267C-suppl2.pdf [file advancesADV2021004267C-suppl2.pdf]

## ASH 2020 Guidelines for Management of Venous Thromboembolism in Latin America

### Supplement 1: Panel and Systematic Review Team Membership

| <b>Panel Members</b> |                                  |                                 |
|----------------------|----------------------------------|---------------------------------|
| 1                    | Ignacio Neumann                  | Panel Facilitator/Methodologist |
| 2                    | Ricardo Aguilar                  | Hematologist                    |
| 3                    | Guillermo León Basantes          | Hematologist                    |
| 4                    | Patricia Casais                  | Hematologist                    |
| 5                    | Cecilia C. Colorio               | Hematologist                    |
| 6                    | Pedro P. García Lázaro           | Hematologist                    |
| 7                    | María Cecilia Guillermo Esposito | Hematologist                    |
| 8                    | Luis A. Meillon-García           | Hematologist                    |
| 9                    | Jaime Pereira                    | Hematologist                    |
| 10                   | Suely Meireles Rezende           | Hematologist                    |
| 11                   | Juan Carlos Serrano              | Hematologist                    |
| 12                   | Mario L. Tejerina Valle          | Hematologist                    |

| <b>Evidence Syntheses Team</b> |                   |                        |
|--------------------------------|-------------------|------------------------|
| 1                              | Holger Schünemann | Principal Investigator |
| 2                              | Ignacio Neumann   | Co-Investigator        |
| 3                              | Ariel Izcovich    | Researcher             |
| 4                              | Lorena Karzulovic | Researcher             |
| 5                              | Gabriel Rada      | Researcher             |
| 6                              | Felipe Vera       | Researcher             |
| 7                              | Yuan Zhang        | Researcher             |
