# Supplementary material
Source: PubMed Central journal article supplement (PMC8361455)
Supplement: advancesADV2021004267C-suppl6.pdf [file advancesADV2021004267C-suppl6.pdf]

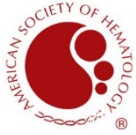

# American Society of Hematology 2020 Guidelines Venous Thromboembolism in Latin America

## Recomendaciones en español

¿Debe usarse tratamiento domiciliario o tratamiento hospitalario en pacientes con trombosis venosa profunda?

### **Recomendación 1:**

En pacientes con trombosis venosa profunda, el panel latinoamericano sugiere tratamiento domiciliario en vez de tratamiento hospitalario (recomendación condicional basada en baja certeza en la evidencia sobre los efectos).

### **Comentarios:**

Esta recomendación no se aplica a pacientes que tienen otras condiciones que podrían requerir hospitalización, tienen apoyo limitado o no tienen apoyo en su domicilio, no pueden afrontar el costo de la medicación o tienen historia/antecedentes de baja adherencia (al tratamiento). Además, en pacientes con trombosis venosa profunda que amenaza alguna extremidad, con alto riesgo de sangrado o que requieran analgésicos intravenosos podría ser necesario comenzar el tratamiento en el hospital.

¿Debe usarse tratamiento ambulatorio versus tratamiento hospitalario en pacientes con embolia pulmonar y bajo riesgo de complicaciones?

### **Recomendación 2:**

En pacientes con embolia pulmonar y bajo riesgo de complicaciones, el panel latinoamericano sugiere usar tratamiento ambulatorio u hospitalario (recomendación condicional basada en muy baja certeza en la evidencia sobre los efectos).

### **Comentarios:**

Esta recomendación no se aplica a pacientes que tienen otras condiciones que requieran hospitalización, pacientes que no tienen apoyo o tienen apoyo limitado en el hogar, que no pueden costear los medicamentos o tienen historia de baja adherencia a los tratamientos. Pacientes con alto riesgo de sangrado podrían necesitar el tratamiento en el hospital. El tratamiento ambulatorio puede no ser factible en el contexto de limitaciones en la cobertura del sistema de salud o restricciones de las aseguradoras.

¿Deben usarse los anticoagulantes orales directos o las heparinas de bajo peso molecular/antagonistas de la vitamina K en pacientes con trombosis venosa profunda/embolia pulmonar?

### **Recomendación 3:**

En pacientes con trombosis venosa profunda o embolia pulmonar, el panel latinoamericano sugiere el uso de anticoagulantes orales directos en vez de antagonistas de la vitamina K (recomendación condicional basada en certeza moderada en la evidencia sobre los efectos).

### **Comentarios:**

Los pacientes que están bien controlados y sin complicaciones con un antagonista de la vitamina K, pueden preferir continuar con el este tratamiento. Alternativamente, los pacientes que están comenzando el tratamiento anticoagulante

pueden preferir los anticoagulantes orales directos en vez de los antagonistas de la vitamina K dada la carga del tratamiento y la potencial reducción del sangrado.

Adicionalmente, los anticoagulantes orales directos pueden ser una buena alternativa en situaciones donde no es posible o es difícil obtener un control confiable de RIN.

El panel enfatiza que la educación del paciente sobre los riesgos de la anticoagulación es igualmente importante con anticoagulantes orales directos, especialmente en situaciones donde sea difícil hacer un seguimiento cercano.

¿Debe usarse el tratamiento trombolítico más la anticoagulación en vez de solamente la anticoagulación en pacientes con trombosis venosa profunda proximal extensa?

**Recomendación 4:**

En los pacientes con trombosis venosa profunda proximal extensa, el panel latinoamericano sugiere no indicar tratamiento trombolítico asociado a la anticoagulación (recomendación condicional basada en baja certeza en la evidencia sobre los efectos).

**Comentarios:**

Resulta razonable considerar el tratamiento con trombolíticos para los pacientes con una trombosis venosa profunda que amenaza la viabilidad de alguna extremidad, los pacientes con síntomas graves que no mejoran con la anticoagulación solamente y los que tienen una trombosis venosa profunda ileofemoral (con riesgo alto de síndrome post trombótico) y que además tienen un riesgo de hemorragia bajo o promedio y una aversión para la posibilidad de síndrome post trombótico.

La decisión final para emplear la trombólisis debe tomar en cuenta el riesgo basal de experimentar un efecto adverso, los valores y preferencias de los pacientes y el acceso a una atención médica con experiencia en ese tratamiento.

¿Debe usarse terapia trombolítica además de anticoagulación en vez de solamente anticoagulación en pacientes con embolia pulmonar submasiva?

**Recomendación 5:**

En pacientes con embolia pulmonar submasiva, el panel latinoamericano sugiere en contra del uso de trombólisis agregado a la anticoagulación (recomendación condicional basada en baja certeza en la evidencia sobre los efectos).

**Comentarios:**

Los pacientes con alto riesgo de muerte por embolia pulmonar y bajo riesgo de sangrado podrían beneficiarse de la trombólisis.

La decisión final sobre si administrar o no trombolíticos debe considerar el riesgo basal de experimentar un evento adverso, los valores y preferencias del paciente y a la posibilidad de acceder a unidades de cuidados críticos con experiencia en el manejo de estos fármacos.

¿Deben usarse medias de compresión graduadas en conjunto con la anticoagulación en vez de solamente anticoagulación en pacientes con alto riesgo de síndrome post trombótico (SPT)?

**Recomendación 6:**

En pacientes con trombosis venosa profunda y alto riesgo de síndrome postrombótico, el panel latinoamericano sugiere en contra del uso de medias de compresión graduadas en conjunto con la anticoagulación (recomendación condicional basada en muy baja certeza en la evidencia sobre los efectos).

¿Debe usarse el Dímero D o las escalas pronósticas para guiar la duración de la anticoagulación en pacientes con trombosis venosa profunda o embolia pulmonar no provocadas?

**Recomendación 7**

En pacientes con trombosis venosa profunda o embolismo pulmonar no provocadas el panel latinoamericano sugiere en contra del uso rutinario de Dímero D o las escalas pronósticas para guiar la duración de la anticoagulación. Estos pacientes deben ser tratados de acuerdo con la recomendación número 8 (recomendación condicional basada en baja certeza en la evidencia sobre los efectos).

**Comentarios:**

El Dímero D es parte de una escala pronóstica y puede ser útil en determinar la duración de la terapia anticoagulante cuando los pacientes no se deciden o la situación clínica es difícil.

¿Debe usarse terapia de anticoagulación indefinida o debe discontinuarse esta terapia después de un periodo de 3 a 6 meses en pacientes con trombosis venosa profunda o embolia pulmonar no provocada?

**Recomendación 8:**

En pacientes con trombosis venosa profunda o embolia pulmonar no provocada, el panel latinoamericano sugiere mantener la anticoagulación indefinida en vez de suspenderla después de un periodo de 3 a 6 meses (recomendación condicional basada en certeza moderada en la evidencia sobre los efectos).

**Comentarios:**

La decisión final de mantener o suspender la anticoagulación después de un periodo inicial debe considerar el riesgo individual de recurrencia del tromboembolismo venoso, el riesgo individual de sangrado, los costos, el acceso al seguimiento y control /monitoreo, y las preferencias y valores del paciente.

Esta recomendación se aplica a pacientes con un riesgo promedio de sangrado. Los profesionales clínicos deben ser conscientes de que el riesgo de sangrado puede cambiar con el tiempo, por lo que se debe evaluar periódicamente el balance entre los efectos deseables e indeseables de la anticoagulación.

¿Debe usarse anticoagulación de duración indefinida versus anticoagulación de duración definida (3 a 6 meses) en pacientes con trombosis venosa o tromboembolismo pulmonar recurrente no provocado?

**Recomendación 9:**

En pacientes con trombosis venosa o tromboembolismo pulmonar recurrente no provocado, el panel latinoamericano recomienda mantener la anticoagulación por tiempo indefinido en vez de discontinuarla después de un periodo de 3 a 6 meses. (recomendación fuerte basada en certeza moderada sobre los efectos).

**Comentarios:**

Esta recomendación asume un riesgo de sangrado promedio y podría no ser aplicable para pacientes con alto riesgo de sangrado. Los profesionales clínicos deben estar atentos a que el riesgo de sangrado puede variar con el tiempo, por lo que el balance entre las consecuencias deseables y no deseables de la anticoagulación indefinida deberá ser reevaluado periódicamente.

¿Debe usarse anticoagulación de manera indefinida en vez de anticoagulación limitada (3-6 meses), en pacientes con trombosis venosa profunda/embolia pulmonar provocados por un factor de riesgo crónico (inmovilidad crónica)?

**Recomendación 10:**

En pacientes con trombosis venosa profunda o embolia pulmonar provocados, relacionados con un factor de riesgo crónico (tetraplejía), el panel latinoamericano recomienda mantener la anticoagulación indefinida en vez de suspenderla, después de un periodo de 3 a 6 meses (recomendación fuerte basada en certeza moderada en la evidencia, sobre los efectos).

**Comentarios:**

Esta recomendación se aplica sólo para factores de riesgo que persistan durante el tiempo y que confieran un riesgo relativamente alto de recurrencia del tromboembolismo venoso.

Además, esta recomendación asume un riesgo promedio de sangrado y podría no aplicar a pacientes con alto riesgo hemorrágico. El riesgo de sangrado puede variar con el tiempo, los profesionales clínicos deben evaluar periódicamente los beneficios y riesgos de la anticoagulación indefinida

¿Debe usarse anticoagulación de duración indefinida versus duración definida (3 a 6 meses) en pacientes con trombosis venosa profunda o embolia pulmonar recurrente provocada?

#### **Recomendación 11:**

En pacientes con trombosis venosa profunda recurrente provocada o embolia pulmonar y con alto riesgo de recurrencia, el panel latinoamericano sugiere mantener la anticoagulación indefinida en vez de suspenderla después de un período de 3 a 6 meses (recomendación condicional basada en certeza moderada en la evidencia sobre los efectos).

#### **Comentarios:**

Esta recomendación se aplica a individuos en quienes la trombosis venosa profunda es provocada por factores de riesgo menores y por lo menos uno de estos eventos presenta un riesgo elevado de recurrencia.

En esta recomendación se asume que se realizó una trombo-profilaxis adecuada, por lo que la misma no aplica a pacientes que no la recibieron. En la recomendación se asume un riesgo promedio de sangrado y puede no aplicarse a pacientes con alto riesgo de sangrado.

La decisión final probablemente variará dependiendo de la gravedad de los eventos trombóticos (trombosis venosa profunda versus embolia pulmonar) y la naturaleza del factor de riesgo (factor de riesgo menor como el uso de hormonas versus factor de riesgo mayor como la cirugía).

¿Debe usarse la aspirina versus anticoagulación en dosis estándar en pacientes en los que se ha decidido terapia antitrombótica de duración indefinida, después de completar un curso de terapia de duración definida inicial (12 meses o menos)?

#### **Recomendación 12:**

En pacientes en los que se prefiere una duración indefinida de la terapia antitrombótica después de completar un curso de terapia de anticoagulación definida inicial (3 a 6 meses), el panel latinoamericano sugiere anticoagulación en vez de la aspirina (recomendación condicional basada en certeza moderada en la evidencia sobre efectos).

#### **Comentarios:**

Esta recomendación valora más la mayor efectividad de la anticoagulación sobre el menor costo de la aspirina.

¿Deben usarse dosis bajas de anticoagulantes orales directos en vez de dosis estándar de anticoagulantes orales directos en pacientes que han completado el curso de tratamiento inicial definido y van a continuar en tratamiento con anticoagulantes orales directos?

#### **Recomendación 13:**

En los pacientes en los que se prefiere una terapia antitrombótica indefinida y que han completado un curso de tratamiento de anticoagulación inicial definido (3 a 6 meses), el panel latinoamericano sugiere usar dosis estándar de anticoagulantes orales directos en vez de dosis bajas de anticoagulantes orales directos. (recomendación condicional basada en baja certeza en la evidencia sobre los efectos).

#### **Comentarios:**

La evidencia de efectividad proviene de ensayos clínicos en los cuales, pacientes que requerían terapia extendida fueron excluidos. Ya que esta recomendación es acorde a la recomendación sobre tratamiento indefinido en individuos que han tenido eventos no provocados o con factor de riesgo crónico, el panel considera que la mayoría de estos pacientes no deben ser tratados con dosis bajas de anticoagulantes orales directos. Sin embargo, dosis bajas pueden ser apropiadas para individuos con un menor riesgo de trombosis o un alto riesgo de sangrado.

¿Deben usarse los anticoagulantes orales directos o las heparinas de bajo peso molecular para pacientes que durante el tratamiento con antagonistas de la vitamina K presentan tvp o tep?

**Recomendación 14:**

En los pacientes con trombosis venosa profunda o embolia pulmonar durante el tratamiento con antagonistas de la vitamina K (AVK), el panel latinoamericano sugiere el uso de las heparinas de bajo peso molecular en vez de los anticoagulantes orales directos (recomendación condicional basada en muy baja certeza en la evidencia sobre los efectos).

**Comentarios:**

Esta recomendación pone más valor en la experiencia extensa con el uso de las heparinas de bajo peso molecular para los padecimientos protrombóticos.

Adicionalmente, esta recomendación asume que la falla a los antagonistas de la vitamina K fue debida a una anticoagulación subóptima. En tales casos, asegurar una dosificación óptima de los antagonistas de la vitamina K puede ser la mejor alternativa.

El panel enfatiza que los profesionales clínicos deben investigar la causa subyacente de la trombosis en los pacientes que la desarrollan durante el tratamiento con antagonistas de la vitamina K.

La elección final del tratamiento debe tomar en cuenta la causa subyacente, así como los valores y preferencias de los pacientes, el costo y la factibilidad de cada alternativa.

¿Debe usarse aspirina o discontinuarse, en pacientes que la usan como prevención cardiovascular primaria y que inician anticoagulación por trombosis venosa profunda, TVP o embolismo pulmonar, EP?

**Recomendación 15:**

El panel latinoamericano sugiere en contra de mantener la aspirina en pacientes bajo tratamiento con aspirina para prevención cardiovascular primaria que inician anticoagulación por trombosis venosa profunda, TVP o embolismo pulmonar EP. (recomendación condicional basada en muy baja certeza en la evidencia sobre los efectos).

¿Debe reanudarse la terapia anticoagulante oral, versus discontinuarse, en pacientes que reciben tratamiento por enfermedad tromboembólica venosa y sobreviven a un episodio de sangrado mayor relacionado a la terapia anticoagulante?

**Recomendación 16:**

En pacientes que reciben tratamiento por ETV que sobreviven a un episodio de sangrado mayor relacionado a la terapia anticoagulante, el panel latinoamericano sugiere reanudar la terapia anticoagulante oral versus discontinuarla (recomendación condicional basada en muy baja certeza en la evidencia sobre los efectos).

**Comentarios:**

La decisión de reanudar la anticoagulación puede variar según el riesgo de TEV recurrente y de sangrado, así como con la severidad del evento hemorrágico que presentó el paciente.

¿Deberían usarse concentrados de 4 factores del complejo protrombínico, versus plasma fresco congelado (además de la cesación temporaria de la anti-vitamina K y vitamina K intravenosa) en pacientes que presentan sangrado que amenaza la vida debido al tratamiento con anti-vitamina K para TEV?

**Recomendación 17:**

En pacientes con sangrado y riesgo de vida durante el tratamiento de TEV, el panel latinoamericano sugiere usar concentrados de 4 factores del complejo protrombínico, o plasma fresco congelado, según la disponibilidad local y las circunstancias clínicas (recomendación condicional basada en muy baja certeza en la evidencia sobre de los efectos).

**Comentarios:**

El panel enfatiza que el médico clínico debe optar por la opción terapéutica más rápida, según la disponibilidad local.

Los pacientes con enfermedad cardíaca, en quienes una sobrecarga de volumen es considerada riesgosa, podrían beneficiarse con el uso de concentrado de factores.

Además, cuando el paciente destaca el querer evitar riesgos de transmisión de infecciones, o en sitios donde las infecciones relacionadas a transfusiones son relativamente frecuentes, los concentrados de complejos protrombínicos pueden ser una mejor opción.

En muchos sitios de la región existe disponibilidad limitada de los concentrados de 4 factores del complejo protrombínico. En tales escenarios, el uso de plasma fresco congelado resulta una buena alternativa para revertir los efectos de la anti-vitamina K.
