# Supplementary material
Source: PubMed Central journal article supplement (PMC8361455)
Supplement: advancesADV2021004267C-suppl7.pdf [file advancesADV2021004267C-suppl7.pdf]

Deve-se usar o tratamento domiciliar ou o hospitalar para pacientes com TVP?

**Recomendação 1:**

Em pacientes com TVP, o Painel de Diretrizes Latino Americano sugere tratamento domiciliar ao tratamento hospitalar (recomendação condicional baseado em níveis de evidência baixos sobre os efeitos).

**Comentários:**

Essa recomendação não se aplica a pacientes que possuem outras condições que requeiram hospitalização, têm suporte ou limitado ou ausente no seu domicílio, não podem adquirir os medicamentos para uso domiciliar ou que possuem história de baixa adesão ao tratamento. Adicionalmente, pacientes com TVP extensa, com risco de perda do membro, com alto risco de sangramento ou que necessitam de analgésicos endovenosos devem iniciar o tratamento no hospital.

Deve ser realizado tratamento domiciliar ou hospitalar em pacientes com TEP e baixo risco de complicações?

**Recomendação 2:**

Em pacientes com TEP e baixo risco de complicações, o Painel de Diretrizes Latino Americano sugere tanto o tratamento domiciliar quanto o tratamento hospitalar (recomendação condicional baseada em níveis de evidência muito baixos sobre os efeitos).

**Comentários:**

Essa recomendação não se aplica aos pacientes que possuem outras condições que requeiram hospitalização, que têm suporte limitado ou nenhum suporte em seu domicílio, que não podem arcar com os custos dos medicamentos para uso domiciliar ou que têm história de baixa adesão. Adicionalmente, pacientes com alto risco de sangramento devem iniciar o tratamento em ambiente hospitalar. O tratamento domiciliar pode não ser aplicável a alguns contextos devido a limitações do sistema de saúde local ou devido à restrições aplicadas pelas seguradoras de saúde.

Deve-se usar anticoagulantes orais diretos ou HBPM/AVK em pacientes com TVP/TEP?

**Recomendação 3:**

Em pacientes com TVP ou TEP, o Painel de Diretrizes Latino Americano sugere o uso de anticoagulantes orais diretos aos AVKs (recomendação condicional baseada em níveis de evidência moderados sobre os efeitos).

**Comentários:**

Pacientes que estão bem controlados ou sem complicações com AVK podem preferir manter-se com AVK. Alternativamente, pacientes que estão iniciando anticoagulação podem preferir anticoagulantes orais diretos aos AVKs devido ao fardo do tratamento com estes e a potencial redução do risco de sangramento com o uso dos anticoagulantes orais diretos.

Adicionalmente, os anticoagulantes orais diretos podem ser uma boa alternativa para situações nas quais a monitorização confiável do RNI não é factível ou é difícil.

O Painel enfatiza que a educação do paciente com relação aos riscos da anticoagulação é igualmente importante no caso de uso dos anticoagulantes orais diretos e AVK, especialmente em situações nas quais o acompanhamento periódico do paciente não é possível ou é difícil.

Deve-se usar terapia trombolítica associada à anticoagulação ou somente anticoagulação em pacientes com TVP proximal extensa?

#### **Recomendação 4:**

Em pacientes com TVP proximal extensa, o Painel de Diretrizes Latino Americano sugere a não trombólise em adição à anticoagulação (recomendação condicional baseada em níveis de evidência baixos sobre os efeitos).

#### **Comentários:**

Pode-se considerar o uso da trombólise em pacientes com TVP extensa com risco de perda do membro, pacientes com sintomas de gravidade que não melhoram com anticoagulação isolada e pacientes com TVP iliofemoral (alto risco para síndrome pós-trombótica) com risco moderado ou baixo de sangramento que tenham aversão à possibilidade de ocorrência de síndrome pós-trombótica.

A decisão final quanto à realização de trombólise deve considerar o risco basal de ocorrência de evento adverso, valores e preferências do paciente, além do acesso a tratamento especializado.

Deve-se usar terapia trombolítica em adição à anticoagulação ou somente anticoagulação em pacientes com TEP sub-macizo?

#### **Recomendação 5:**

Em pacientes com TEP sub-macizo, o Painel de Diretrizes Latino Americano sugere o não uso de trombólise em adição à anticoagulação (recomendação condicional baseada em nível de evidência baixo sobre os efeitos).

#### **Comentários:**

Pacientes com alto risco de morte devido à TEP e baixo risco de sangramento podem se beneficiar da trombólise.

A decisão final quanto ao uso de trombólise deve considerar o risco basal de ocorrência de evento adverso, valores e preferências do paciente, além do acesso a tratamento intensivo com profissionais experientes.

Deve-se usar meias elásticas de compressão em associação a anticoagulação ou somente anticoagulação em pacientes com alto risco de síndrome pós-trombótica?

#### **Recomendação 6:**

Em pacientes com TVP e alto risco de síndrome pós-trombótica, o Painel de Diretrizes Latino Americano sugere o não uso de meias elásticas de compressão em adição à anticoagulação (recomendação condicional baseada em nível de evidência muito baixo sobre os efeitos).

Nos pacientes com TVP ou EP, deveríamos utilizar D-dímero ou escores prognósticos para determinar a duração da anticoagulação?

### **Recomendação 7:**

Nos pacientes com TVP ou EP não provocada, o Painel de Diretrizes Latino Americano não é a favor do uso de D-dímero ou escores prognósticos para determinar a duração da anticoagulação. Pelo contrário, a maioria dos indivíduos deve ser tratada de acordo com a recomendação 8 (recomendação condicional com base na incerteza sobre as evidências dos efeitos).

#### **Comentários:**

O D-dímero apenas ou como parte de um modelo prognóstico pode ser útil para determinar a duração da anticoagulação quando os pacientes não estão decididos, ou a situação clínica for difícil.

Deve-se usar anticoagulação de duração indefinida ou definida (3 a 6 meses) em pacientes com TVP/PE não provocada?

### **Recomendação 8:**

Em pacientes com TVP ou TEP não provocadas, o Painel de Diretrizes Latino Americano sugere manter anticoagulação indefinida à suspensão da anticoagulação após um período de 3 a 6 meses (recomendação condicional baseada em nível de evidência moderada sobre os efeitos).

#### **Comentários:**

A decisão final de manter ou interromper a anticoagulação após um período inicial deve considerar o risco individual de recorrência do TEV, o risco individual de sangramento, custos, acesso a acompanhamento médico e monitorização do tratamento, valores e preferências do paciente.

Essa recomendação se aplica a pacientes com um risco habitual de sangramento. Os médicos devem estar cientes de que o risco de sangramento pode mudar ao longo do tempo. Assim, o equilíbrio entre os efeitos desejáveis e indesejáveis da anticoagulação indefinida deve ser reavaliado periodicamente.

Deve-se usar anticoagulação com duração indefinida ou definida (3 a 6 meses) em pacientes com TVP ou TEP recorrente não provocada?

### **Recomendação 9:**

Em pacientes com TVP ou TEP recorrente não provocada, o Painel de Diretrizes Latino Americano recomenda manter anticoagulação com duração indefinida à suspensão da anticoagulação após um período de 3 a 6 meses (recomendação forte baseada em níveis de evidência moderados sobre os efeitos).

#### **Comentários:**

Essa recomendação assume que o risco de sangramento é habitual e, portanto, pode não ser aplicável à pacientes com alto risco de sangramento. Os médicos devem estar cientes de que o risco de sangramento pode mudar ao longo do tempo. Assim, o equilíbrio entre os efeitos desejáveis ou não da anticoagulação de duração indefinida deve ser reavaliado periodicamente.

Deve-se usar anticoagulação de duração indefinida ou definida (3 a 6 meses) em pacientes com TVP/PE provocada relacionada a fatores de risco crônicos (isto é, imobilidade crônica)?

#### **Recomendação 10:**

Em pacientes com TVP ou TEP provocada relacionada a fator de risco crônico (isto é, tetraplegia), o Painel de Diretrizes Latino Americano recomenda manter anticoagulação indefinida à suspensão da anticoagulação após um período de 3 a 6 meses (recomendação forte baseada em níveis de evidência moderados sobre os efeitos).

#### **Comentários:**

Essa recomendação se aplica somente aos fatores de risco que persistem ao longo do tempo e conferem um risco relativamente alto de recorrência de TEV.

Adicionalmente, essa recomendação assume um risco habitual de sangramento e pode não se aplicar a pacientes com alto risco de sangramento. Os médicos devem estar cientes de que o risco de sangramento pode mudar ao longo do tempo, e que portanto potenciais danos e benefícios da anticoagulação indefinida devem ser reavaliados periodicamente.

Deve-se usar anticoagulação de duração indefinida ou definida (3 a 6 meses) em pacientes com TVP/TEP provocada recorrente?

#### **Recomendação 11:**

Em pacientes com TVP ou TEP provocada recorrente e com alto risco de recorrência, o Painel de Diretrizes Latino Americano sugere a manutenção de anticoagulação indefinida à suspensão da anticoagulação após um período de 3 a 6 meses de anticoagulação (recomendação condicional baseada em níveis de evidência moderados sobre os efeitos).

#### **Comentários:**

Essa recomendação se aplica a indivíduos nos quais os eventos de TEV foram provocados por um fator de risco menor e pelo menos um desses eventos apresenta alto risco de recorrência.

Essa recomendação assume que, quando aplicável, a trombopprofilaxia adequada foi realizada. Assim, esta recomendação pode não se aplicar a pacientes que não a receberam. Adicionalmente, a recomendação considera um risco habitual de sangramento e pode não se aplicar a pacientes com alto risco de sangramento.

A decisão final provavelmente vai variar na dependência da gravidade tanto dos eventos trombóticos (isto é, TVP ou TEP) quanto da natureza do fator de risco para TEV (isto é, se o fator de risco for menor, como hormonioterapia ou maior, como cirurgia).

Deve-se usar aspirina ou anticoagulação em dose padrão para pacientes nos quais optou-se pela terapia antitrombótica de duração indefinida, após conclusão do curso inicial da terapia proposta (12 meses ou menos)?

#### **Recomendação 12:**

Em pacientes nos quais optou-se pela terapia antitrombótica de duração indefinida após o término do curso inicial de terapia com duração definida (3 a 6 meses), o Painel de Diretrizes Latino Americano sugere o uso de anticoagulação ao de aspirina (recomendação condicional baseada em nível de evidência moderado sobre os efeitos).

**Comentários:**

Essa recomendação considera mais valiosa a alta efetividade da anticoagulação do que o baixo custo da aspirina.

Deve-se usar dose baixa ou dose padrão de anticoagulante oral direto para pacientes que concluíram um curso inicialmente definido de terapia e manterão o uso de anticoagulante oral direto?

**Recomendação 13:**

Em pacientes nos quais preferiu-se a terapia antitrombótica por duração indefinida após completado o tratamento antitrombótico inicial (3 a 6 meses), o Painel de Diretrizes Latino Americano sugere usar a dose padrão de anticoagulante oral direto à dose baixa de anticoagulante oral direto (recomendação condicional baseada em nível de evidência baixo sobre os efeitos).

**Comentários:**

A evidência de efetividade é proveniente de estudos nos quais os pacientes que necessitaram de terapia anticoagulante estendida foram excluídos. Uma vez que essa recomendação refere-se ao tratamento indefinido em pacientes com eventos não provocados ou provocados por um fator de risco permanente, o Painel considerou que a maioria desses pacientes não deve ser tratado com doses mais baixas. Entretanto, doses mais baixas de anticoagulante oral direto podem ser apropriadas para indivíduos com risco mais baixo de recorrência de trombose ou com maior risco de sangramento.

Deve-se usar anticoagulante oral direto ou HBPM em pacientes que desenvolveram TVP/TEP durante o tratamento com antagonista de vitamina K (AVK)?

**Recomendação 14:**

Em pacientes que desenvolveram TVP ou TEP durante o tratamento com AVK, o Painel de Diretrizes Latino Americano sugere usar HBPM aos anticoagulantes orais diretos (recomendação condicional baseada em níveis de evidência muito baixos sobre os efeitos).

**Comentários:**

Essa recomendação considera mais valiosa a longa experiência de uso de HBPM no tratamento das condições pró-trombóticas.

Adicionalmente, essa recomendação assume que a falha do AVK tenha ocorrido devido a anticoagulação sub-ótima. Nesses casos, assegurar uma dose ótima de AVK deve ser a melhor alternativa.

O Painel enfatiza que os médicos devem explorar a causa subjacente de TEV em pacientes que desenvolveram um novo evento trombótico durante o tratamento com AVK.

A decisão final do tratamento deve levar em consideração a causa subjacente da trombose, assim como os valores e preferências do paciente, custo e viabilidade de cada alternativa.

Deve-se usar aspirina associada a anticoagulação ou somente a anticoagulação para pacientes com terapia antitrombótica com outras indicações para aspirina?

**Recomendação 15:**

Em pacientes que usam aspirina para prevenção cardiovascular primária e iniciam anticoagulação para trombose venosa profunda [TVP] ou tromboembolismo pulmonar [TEP], o Painel de Diretrizes Latino Americano sugere a não manutenção de aspirina (recomendação condicional baseada em níveis de evidência muito baixos sobre os efeitos).

Deve a anticoagulação oral ser reiniciada ou ser descontinuada em pacientes em tratamento para TEV que sobreviveram a um episódio de sangramento maior durante o tratamento com anticoagulante?

**Recomendação 16:**

Em pacientes que, durante o tratamento de TEV, sobreviveram a um episódio de sangramento maior relacionado à terapia anticoagulante, o Painel de Diretrizes Latino Americano sugere reiniciar o tratamento com anticoagulação oral à descontinuação da terapia (recomendação condicional baseada em nível de evidência muito baixo sobre os efeitos).

**Comentários:**

A decisão de reiniciar a anticoagulação pode variar com o risco de recorrência de TEV e sangramento, assim como a gravidade do evento hemorrágico apresentado pelo paciente.

Deve-se usar concentrado de complexo protrombínico de 4 fatores (CCP4) ou plasma fresco congelado associados à interrupção temporária de AVK e vitamina K endovenosa em pacientes com sangramento grave com risco de morte relacionado a AVK durante o tratamento para TEV?

**Recomendação 17:**

Em pacientes com sangramento grave com risco de morte relacionado ao uso de AVK durante o tratamento para TEV, o Painel de Diretrizes Latino Americano sugere tanto o uso do CCP4 quanto o plasma fresco congelado de acordo com a disponibilidade local e condições clínicas do paciente (recomendação condicional baseada em níveis de evidência muito baixos sobre os efeitos).

**Comentários:**

O Painel enfatiza que médicos devem priorizar a opção mais rápida de acordo com a disponibilidade local.

Pacientes com doença cardíaca podem se beneficiar do uso de CCP4 se a sobrecarga de volume for considerada arriscada.

Além disso, quando os pacientes valorizam a prevenção de infecções transmissíveis por hemocomponentes ou em locais onde infecções relacionadas a hemotransfusão são relativamente frequentes, o CCP4 pode ser uma melhor opção.

Em muitas instituições na América Latina, há limitada disponibilidade de CCP4. Nesses cenários, o plasma fresco congelado é uma boa alternativa para reverter efeitos dos AVK.
